# Supplementary material
Source: HighWire-hosted journal article supplement (https://www.jneurosci.org/highwire/filestream/599310/field_highwire_adjunct_files/7/Supplemental_Table_4.pdf)
Supplement: Supplemental_Table_4.pdf [file Supplemental_Table_4.pdf]

**Supplemental Table 4. Significantly cortical thinning within the ROIs in AD patients as compared to controls**

| Regions | <i>T</i> value | <i>P</i> value |
|---------|----------------|----------------|
| STG.R   | -5.066         | 0.00005        |
| PHG.R   | -5.055         | 0.00006        |
| PCU.L   | -4.516         | 0.0006         |
| SMG.R   | -4.451         | 0.0008         |
| UNC.R   | -4.368         | 0.0011         |
| STG.L   | -4.288         | 0.0016         |
| PHG.L   | -4.181         | 0.0024         |
| ITG.R   | -4.177         | 0.0025         |
| ANG.R   | -3.987         | 0.0052         |
| PCU.R   | -3.922         | 0.0067         |
| MTG.R   | -3.889         | 0.0076         |
| IFG.R   | -3.775         | 0.0116         |
| INS.R   | -3.678         | 0.0166         |
| MFG.R   | -3.305         | 0.0615         |
| SOG.L   | -3.200         | 0.0874         |
| MTG.L   | -3.154         | 0.1015         |
| SMG.L   | -3.147         | 0.1038         |

Cortical regions showing significantly AD-associated thinning were listed. The regions were parcellated by a pre-defined atlas (Supplemental Table 1) and mean cortical thickness for each region was measured as the average thickness of all vertices defined as belonging to that region (see Methods and Materials for details). To determine the significance of the differences in regional mean cortical thickness between normal controls and AD patients, a linear regression analysis was performed at every region, regressing regional mean thickness against clinical state (controls vs. AD). This analysis also included age and gender as covariates. *P* values indicate the significant level after a Bonferonni correction for multiple comparisons. It is noted that the results shown in the table are compatible with a vertex-by-vertex analysis about focal cortical thinning (Supplemental Figure 3). For the abbreviation of the regions, see Supplemental Table 1.
